# Supplementary material
Source: PubMed Central journal article supplement (PMC9119168)
Supplement: mmc1.pdf [file mmc1.pdf]

Roy et al.  
Supplemental Materials

Tables S1-S2  
Figures S1-S3

Supplemental Table 1: IC<sub>50</sub> of the selected compounds in AS, FP, and FRET assays

| Compound Identification number (CID) | Vendor ID      | IC <sub>50</sub> AS SARS-CoV-2 (μM) | IC <sub>50</sub> FP SARS-CoV-2 (μM) | IC <sub>50</sub> AS MDO2 (μM) | IC <sub>50</sub> AS MERS (μM) | IC <sub>50</sub> FRET SARS-CoV-2 (μM) |
|--------------------------------------|----------------|-------------------------------------|-------------------------------------|-------------------------------|-------------------------------|---------------------------------------|
| ADP-ribose                           |                | 1.5 ±0.05                           | 9.74 ±0.75                          | 0.42 ±0.05                    | 1.25 ±0.23                    | N.D.                                  |
| Compounds inhibit AS only            |                |                                     |                                     |                               |                               |                                       |
| 652774                               | SEW06255 (4)   | 7.95 ± 0.8                          | >300                                | N.D.                          | N.D.                          | N.D.                                  |
| 146057618                            | F594-1030 (8)  | 139.85 ± 3.0                        | >300                                | >300                          | N.D.                          | N.D.                                  |
| 146057597                            | F594-0985 (9)  | 74.91 ± 4.5                         | >300                                | >300                          | N.D.                          | N.D.                                  |
| 73089208                             | NP-002118 (14) | 36.67 ± 3.7                         | >300                                | 93.0                          | N.D.                          | N.D.                                  |

(N.D.) not determined

Table S2: Compound docking scores

| <b>Compound #</b> | <b>docking score</b> | <b>glide emodel</b> | <b>Mac1 Structure</b> |
|-------------------|----------------------|---------------------|-----------------------|
| 1                 | -7.857               | -81.695             | 6WOJ                  |
| 6                 | -4.563               | -50.414             | 7RK0                  |
| 7                 | -3.338               | -34.249             | 7RK0                  |
| 8                 | -4.064               | -57.015             | 7RK0                  |
| 9                 | -4.287               | -61.816             | 7RK0                  |
| 10                | -4.806               | -59.941             | 6WEY                  |
| 11                | -5.306               | -58.757             | 6WEY                  |

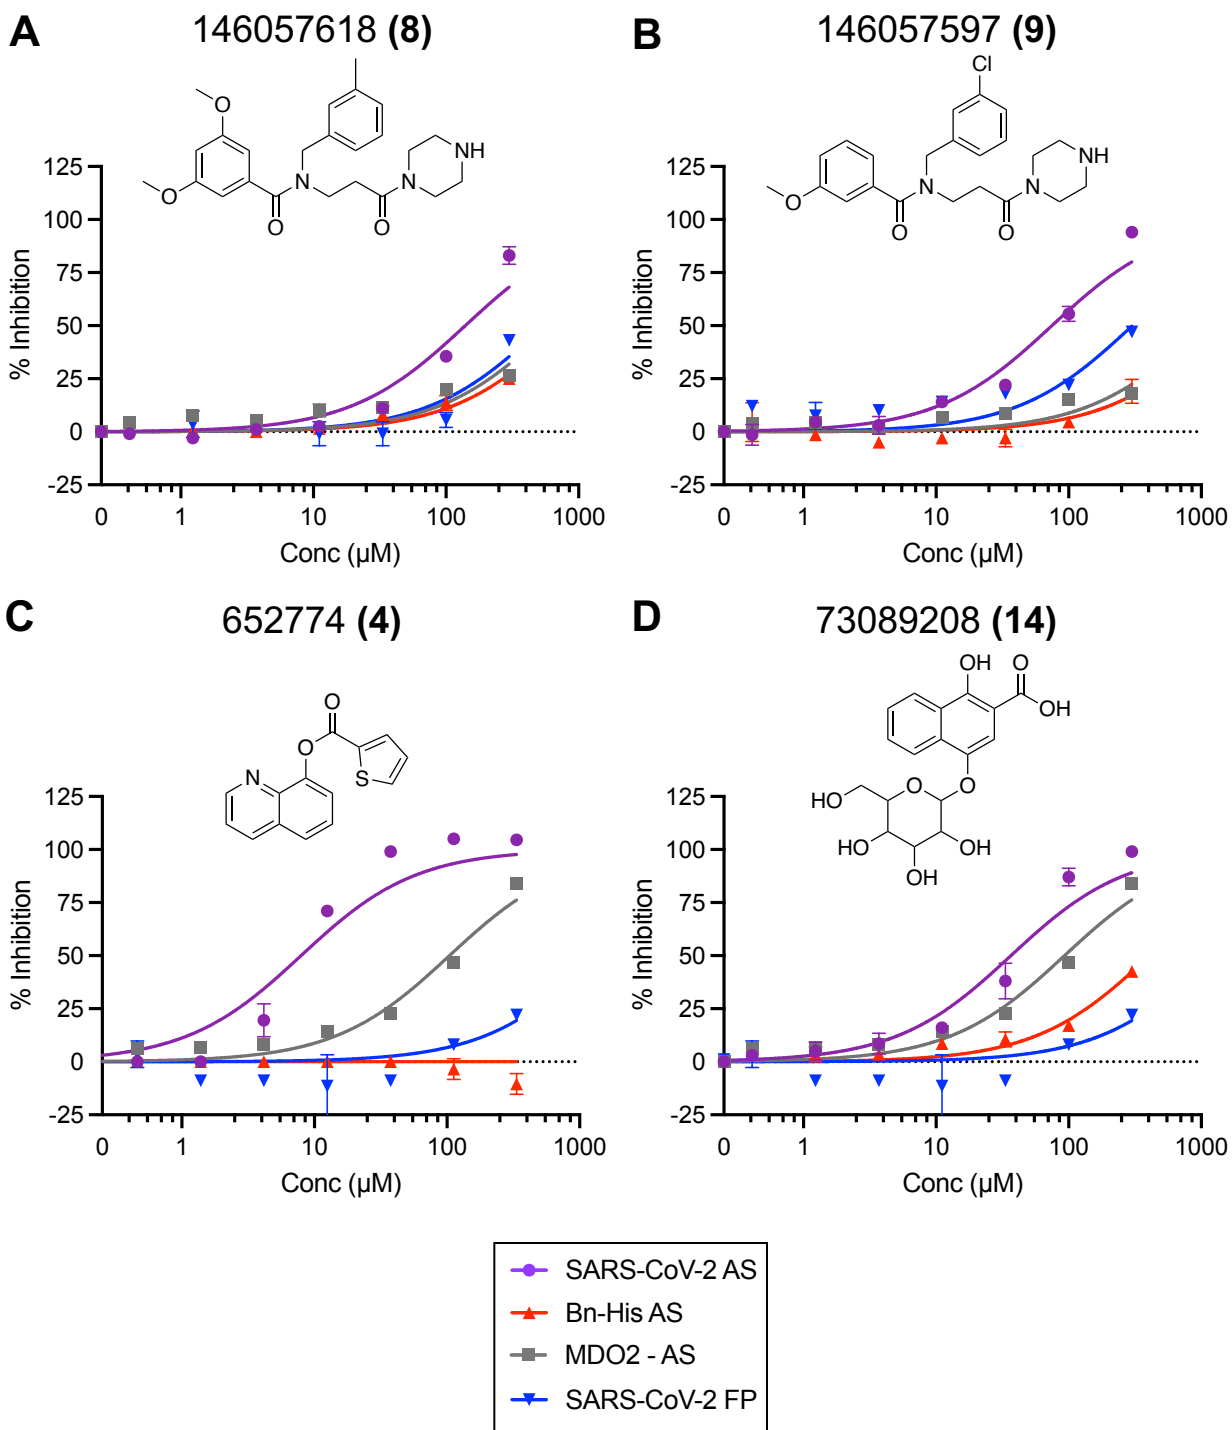

**Fig. S1.** Identification of chemical compounds that inhibit SARS-CoV-2 Mac1 ADP-ribose binding. Dose-response curves representing hit compounds identified in the HTS that only inhibited the AS assay, including compounds 8 (A), 9 (B), 4 (C), and 14 (D). Data was analyzed as described in Methods. Data represent the means  $\pm$  SD of at least 2 independent experiments for each compound. Structures were created using ChemDraw.

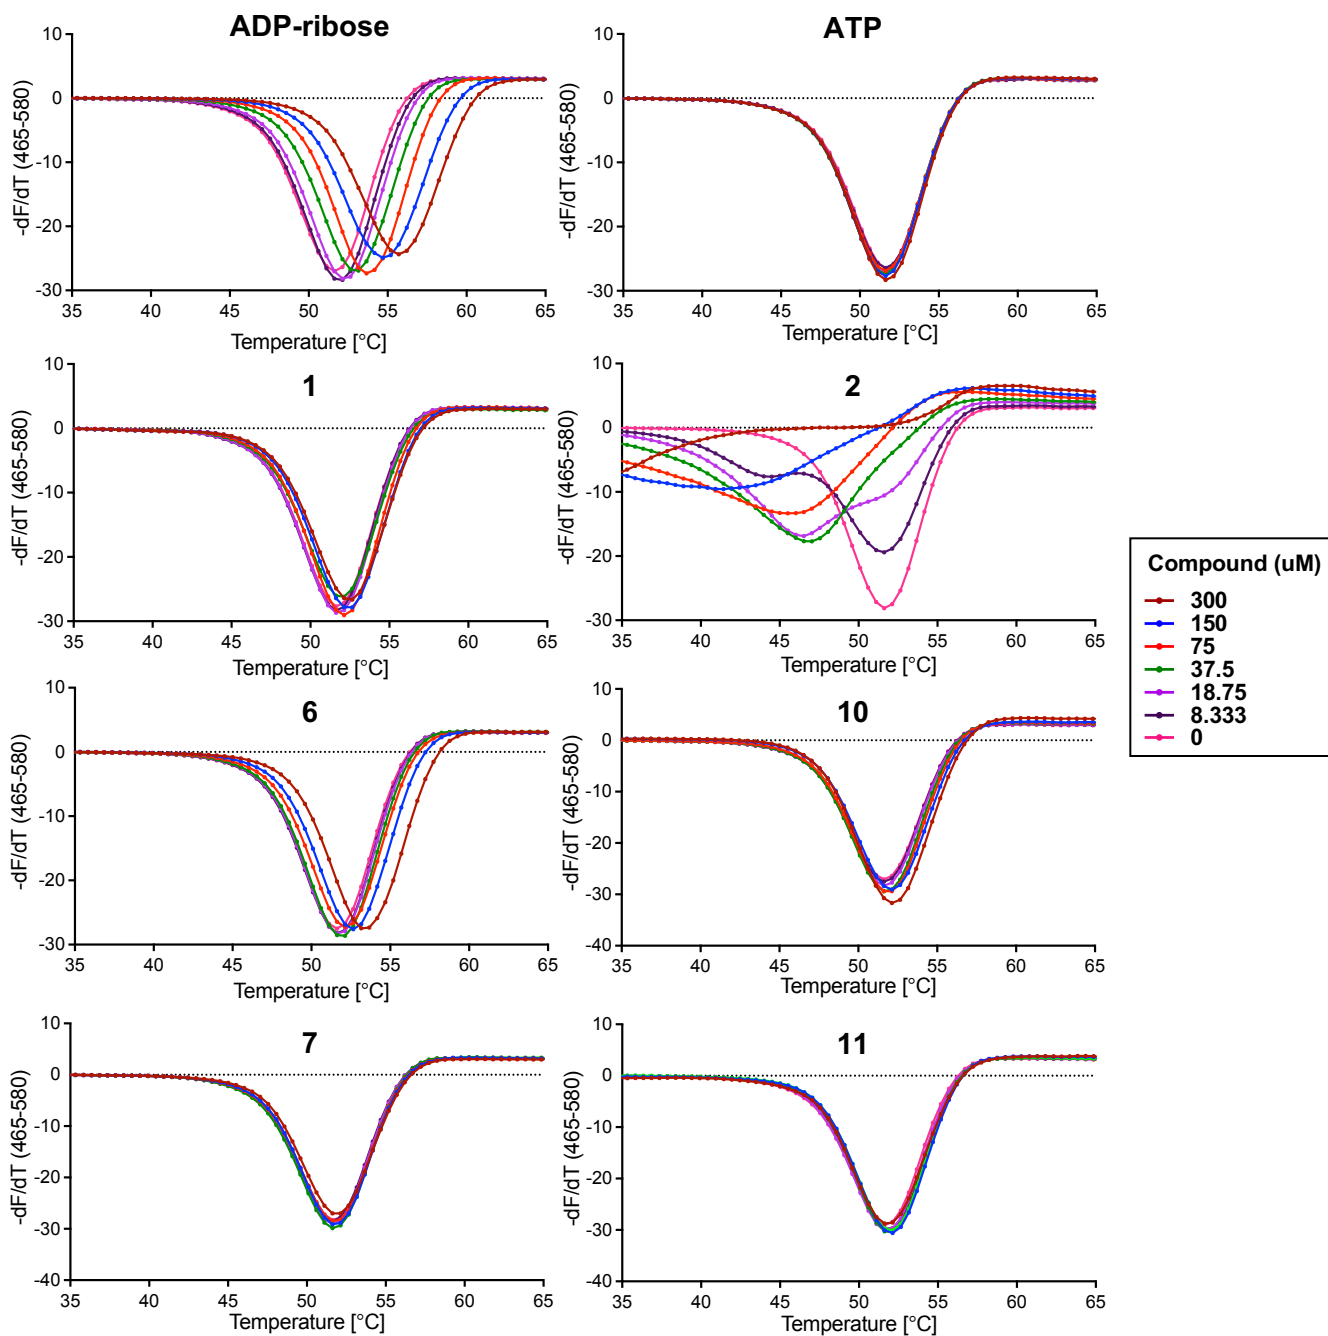

**Fig. S2.** Thermal stability of SARS-CoV-2 Mac1 after incubation with hit compounds. The top 6 hit compounds were tested for their ability to increase the thermal stability of SARS-CoV-2 Mac1 in a differential scanning fluorimetry assay (DSF). Thermal profiles are shown for each compound at different concentrations.

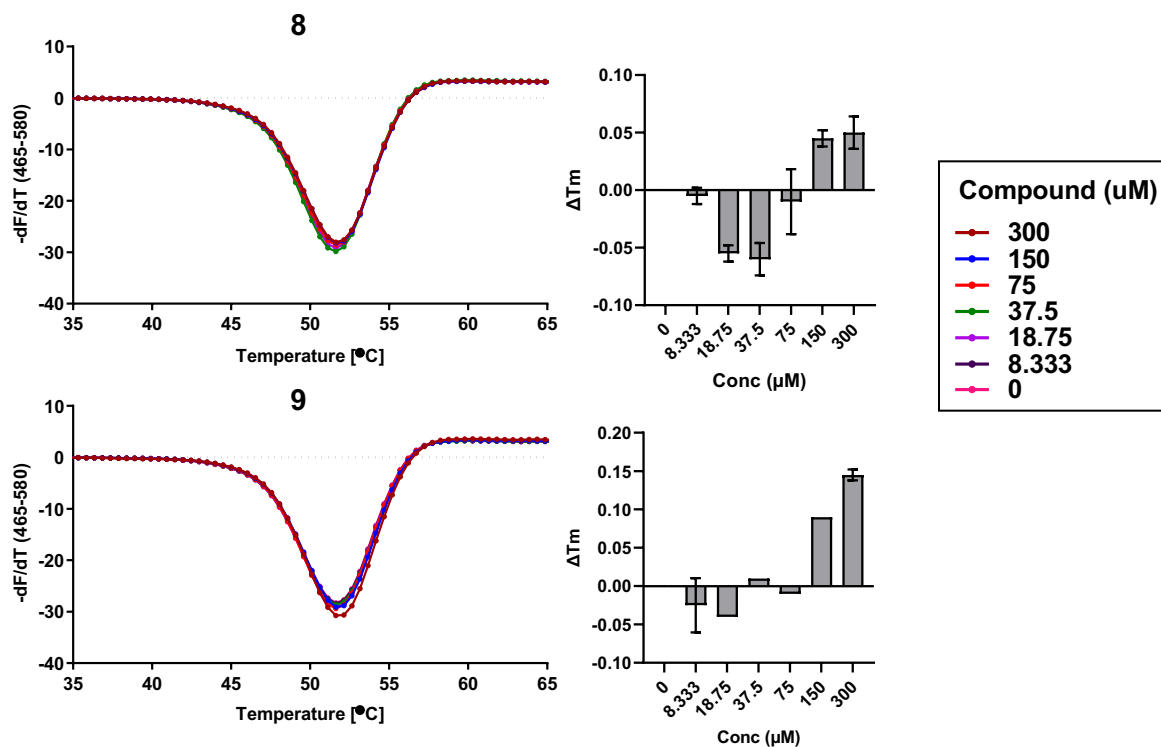

**Fig. S3.** Thermal stability of SARS-CoV-2 Mac1 after incubation with compound **6** analogs. Two analogs of **6**, **8** & **9**, are shown here for their ability to increase the thermal stability of SARS-CoV-2 Mac1 in a differential scanning fluorimetry assay (DSF). Thermal profiles and change in  $T_m$  are plotted for each compound at different concentrations.
